# Supplementary material for: Application of dried blood spot sample pooling strategies for Plasmodium 18S rRNA biomarker testing to facilitate identification of infected persons in large-scale epidemiological studies
Source: PubMed Central journal article supplement (PMC8499573; doi:10.1186/s12936-021-03907-8), 2021-10-07
Supplement: 12936_2021_3907_MOESM4_ESM.pdf [file 12936_2021_3907_MOESM4_ESM.pdf]

**Table S1. Measurements and percentages of detection date for varied concentrations of *P.***

*falciparum* Armored RNA® in liquid and DBS samples by the standard assay

| <i>Pf</i> Armored RNA®    |                                             | Liquid samples                      |     |               |     | DBS samples                         |     |               |     |
|---------------------------|---------------------------------------------|-------------------------------------|-----|---------------|-----|-------------------------------------|-----|---------------|-----|
| Dilution                  |                                             | (log <sub>10</sub> copies/mL blood) |     |               |     | (log <sub>10</sub> copies/mL blood) |     |               |     |
| Parasites<br>/mL<br>blood | Log <sub>10</sub><br>copies/<br>mL<br>blood | <i>Pf</i> qRT-PCR                   |     | Pan qRT-PCR   |     | <i>Pf</i> qRT-PCR                   |     | Pan qRT-PCR   |     |
|                           |                                             | Mean                                | SD  | Mean          | SD  | Mean                                | SD  | Mean          | SD  |
| 2.4x10 <sup>5</sup>       | 9.2                                         | 9.1                                 | 0.2 | 9.1           | 0.3 | 8.6                                 | 0.2 | 8.8           | 0.3 |
| 2.8x10 <sup>4</sup>       | 8.3                                         | 7.9                                 | 0.2 | 8.1           | 0.1 | 7.6                                 | 0.3 | 7.8           | 0.4 |
| 2,8x10 <sup>3</sup>       | 7.3                                         | 7.0                                 | 0.1 | 7.2           | 0.1 | 6.7                                 | 0.2 | 6.7           | 0.3 |
| 2.8x10 <sup>2</sup>       | 6.3                                         | 6.1                                 | 0.1 | 6.1           | 0.1 | 5.8                                 | 0.3 | 5.5           | 0.8 |
| 2.8x10 <sup>1</sup>       | 5.3                                         | 5.2                                 | 0.1 | 5.0           | 0.4 | 4.9                                 | 0.4 | 4.7           | 0.4 |
| 1.7x10 <sup>1</sup>       | 5.1                                         | 4.9                                 | 0.3 | 4.5           | 0.3 | 3.5<br>(4/6*)                       | n/a | 4.3<br>(5/6*) | n/a |
| 7                         | 4.7                                         | 4.6<br>(1/3*)                       | n/a | 3.7<br>(2/3*) | n/a | 4.1<br>(1/6*)                       | n/a | 3.7<br>(2/6*) | n/a |

*Pf*: *P. falciparum*; Pan: pan-*Plasmodium*.

n/a, not applicable (SD not calculated for replicates of <100% detection rate)

SD reflects variation in two batches of samples measured by multiple operators; n=3-6 samples per concentration level.

\* Average calculated for quantifiable samples only (numbers in parentheses are detected results/number of replicates tested)

**Table S2. Sensitivity of pan-*Plasmodium* qRT-PCR of simplified and standard assays for**

**DBS samples**

| <i>Pf</i><br>Armored<br>RNA <sup>®</sup><br>DBS | Dilutio<br>n | Log <sub>10</sub><br>copies/mL<br>blood | Log <sub>10</sub><br>copies /<br>50-μL spot | Standard assay (log <sub>10</sub><br>copies /50-μL spot) |     | Simplified assay (no<br>TBP) (log <sub>10</sub> copies /50-<br>μL spot) |     |
|-------------------------------------------------|--------------|-----------------------------------------|---------------------------------------------|----------------------------------------------------------|-----|-------------------------------------------------------------------------|-----|
|                                                 |              |                                         |                                             | Mean <sup>#</sup>                                        | SD  | Mean <sup>+</sup>                                                       | SD  |
| Level C                                         | Neat         | 7.3                                     | 6.0                                         | 5.3                                                      | 0.0 | 5.4                                                                     | 0.1 |
|                                                 | 1:3          | 6.8                                     | 5.5                                         | 4.9                                                      | 0.1 | 4.8                                                                     | 0.1 |
|                                                 | 1:10         | 6.3                                     | 5.0                                         | 4.4                                                      | 0.1 | 4.3                                                                     | 0.1 |
| Level D                                         | Neat         | 6.3                                     | 5.0                                         | 3.8                                                      | 1.0 | 4.4                                                                     | 0.0 |
|                                                 | 1:3          | 5.8                                     | 4.5                                         | 3.4                                                      | 0.7 | 3.5                                                                     | 0.5 |
|                                                 | 1:10         | 5.3                                     | 4.0                                         | 3.2                                                      | 0.1 | 3.4                                                                     | 0.1 |
| Level E                                         | Neat         | 5.3                                     | 4.0                                         | 3.1                                                      | 0.2 | 3.2                                                                     | 0.2 |
|                                                 | 1:3          | 4.8                                     | 3.5                                         | 0.0<br>(0/2*)                                            | n/a | 2.9                                                                     | 0.1 |
|                                                 | 1:10         | 4.3                                     | 3.0                                         | 0.0<br>(0/4*)                                            | n/a | 2.17 (4/8*)                                                             | n/a |
| Level F                                         | Neat         | 5.1                                     | 3.8                                         | 3.0<br>(2/3*)                                            | n/a | 3.2                                                                     | 0.2 |
|                                                 | 1:3          | 4.6                                     | 3.3                                         | 2.6<br>(1/3*)                                            | n/a | 2.6 (4/5*)                                                              | n/a |

|  |      |     |     |               |     |             |     |
|--|------|-----|-----|---------------|-----|-------------|-----|
|  | 1:10 | 4.1 | 2.8 | 0.0<br>(0/6*) | n/a | 1.7 (5/10*) | n/a |
|--|------|-----|-----|---------------|-----|-------------|-----|

*Pf: P. falciparum*; n/a, not applicable (SD not calculated for replicates of <100% detection rate)

# n=2-6 replicates per dilution

+ n=4-10 replicates per dilution

\* Average calculated for quantifiable samples only (numbers in parentheses are detected results/number of replicates tested)

**Table S3. Nearly optimized pooling sizes to yield lowest total test counts for a cohort of 1,000 samples using three-stage hierarchy pooling schemes.**

| Prevalence rate | Number of positive cases | Pool size for the first step | Pool size for the second step | Total test count |
|-----------------|--------------------------|------------------------------|-------------------------------|------------------|
| 0.1%            | 1                        | 25                           | 5                             | 50               |
| 0.5%            | 5                        | 25                           | 5                             | 90               |
| 2%              | 20                       | 10                           | 4                             | 230              |
| 5%              | 50                       | 6                            | 3                             | 417              |
| 7%              | 70                       | 5                            | 2                             | 515              |
| 10%             | 100                      | 4                            | 2                             | 650              |

**Table S4. Total test counts for even and clustered (50%) distributions**

| Prevalence rate | Number of positive cases | Three-stage hierarchy pooling schemes   |                                               |             | Two-stage hierarchy pooling schemes     |                                               |             |
|-----------------|--------------------------|-----------------------------------------|-----------------------------------------------|-------------|-----------------------------------------|-----------------------------------------------|-------------|
|                 |                          | Total test counts for even distribution | Total test counts for clustered distribution* | % reduction | Total test counts for even distribution | Total test counts for clustered distribution^ | % reduction |
| 0.1%            | 1                        | 50                                      | 41                                            | 18%         | 63                                      | 47                                            | 25%         |
| 0.5%            | 5                        | 90                                      | 46                                            | 49%         | 141                                     | 106                                           | 25%         |
| 2%              | 20                       | 230                                     | 130                                           | 43%         | 283                                     | 213                                           | 25%         |
| 5%              | 50                       | 417                                     | 267                                           | 36%         | 450                                     | 350                                           | 22%         |
| 7%              | 70                       | 515                                     | 410                                           | 20%         | 530                                     | 390                                           | 26%         |
| 10%             | 100                      | 650                                     | 550                                           | 15%         | 633                                     | 483                                           | 24%         |

\* All positive cases were clustered in half (50%) of the first pools.

^ All positive cases were clustered in half (50%) of the pools.

**Figure S1. Four different levels of *P. falciparum* 18S rRNA in DBS stored at four different temperatures for one month.** DBS labelled with the High, Moderate, Low, and Very Low controls contained 50  $\mu$ L per spot of nominal  $3.5 \times 10^6$ ,  $1.2 \times 10^4$ ,  $1.4 \times 10^2$ , and  $5 \times 10^2$  parasites/mL blood, respectively. Storage temperatures are as shown in the legend. Three spots were excised for each sample and each spot was tested twice. Mean and  $\pm$ SD were plotted for results. Pf, *P. falciparum*; Pan, pan-*Plasmodium*.

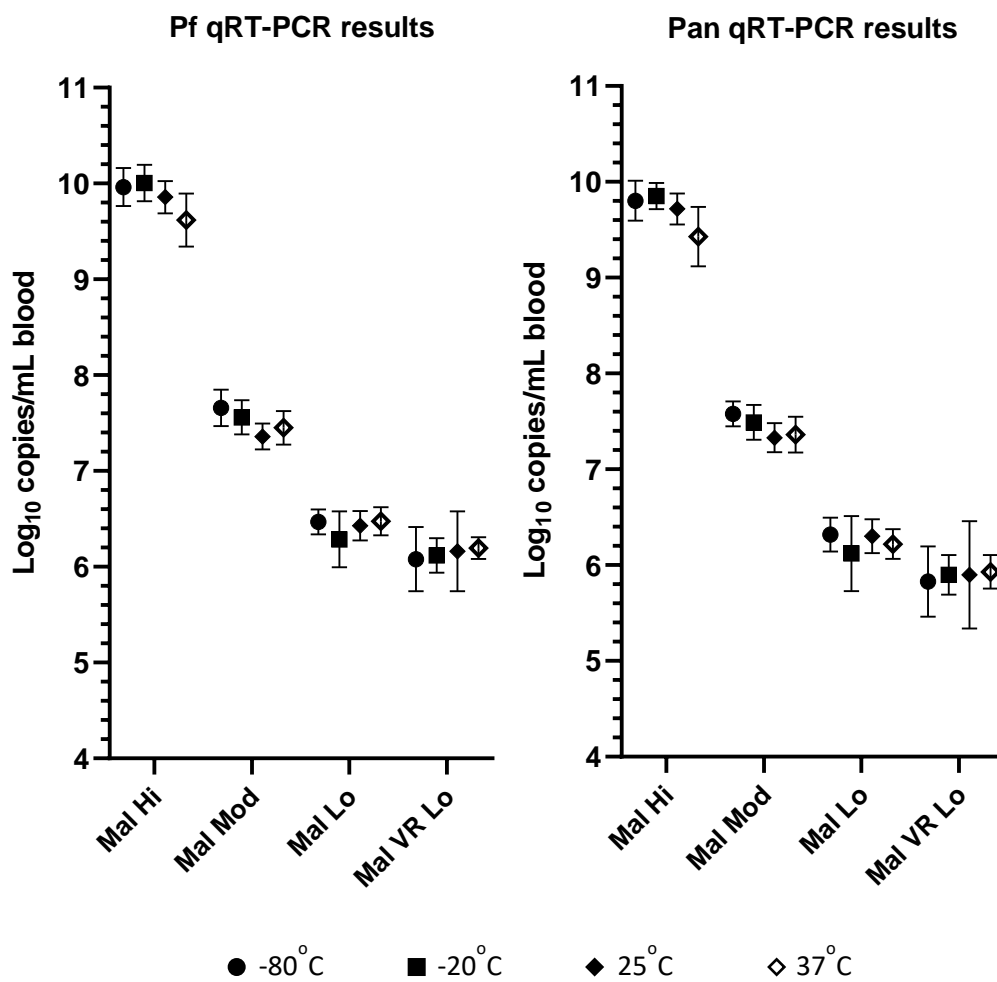

**Figure S2. Estimated total test counts** using the two-stage hierarchy and the square matrix pooling schemes. Test counts for a cohort of 1,000 samples were calculated for varied pooling sizes and each five prevalence rates (i.e., 0.1%, 0.5%, 2%, 5% and 10%) using the two-stage hierarchy pooling schemes (A) and the square matrix pooling scheme (B). Both figures do not show the extended trend for 0.1% prevalence rate that total test counts continue lower for larger pool sizes.

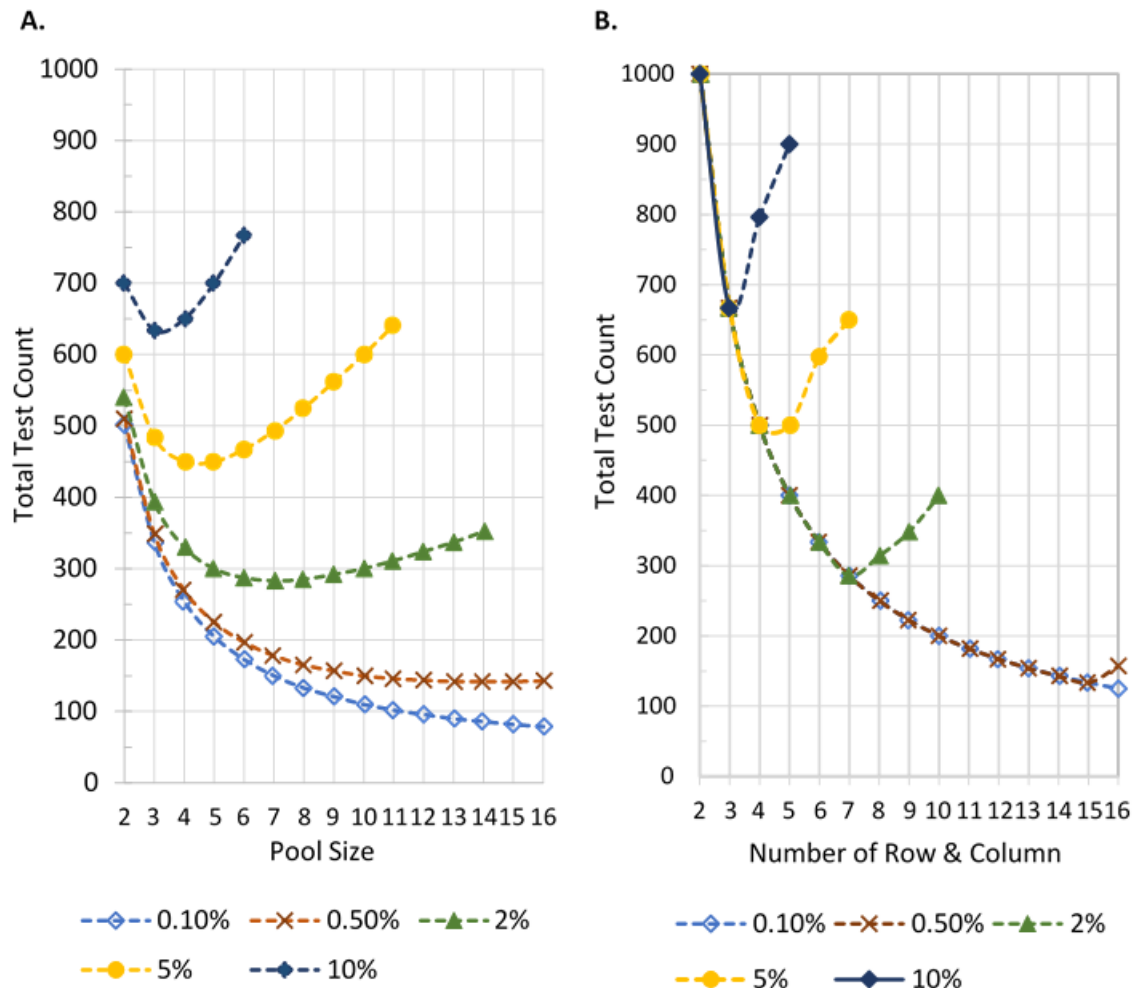

**Figure S3. Square matrix pooling scheme.** The only positive case is identified by positive results of the first row pool and the first column pool (A). Even distribution (B) or clustered placement (C) of two positive cases occur in the matrix.

**A.**

|             |     |     |     |     |     |       |
|-------------|-----|-----|-----|-----|-----|-------|
|             |     |     |     |     |     |       |
|             | X   |     |     |     |     | 1 Pos |
|             |     |     |     |     |     | 2 Neg |
|             |     |     |     |     |     | 3 Neg |
|             |     |     |     |     |     | 4 Neg |
|             |     |     |     |     |     | 5 Neg |
| Column pool | 1   | 2   | 3   | 4   | 5   |       |
| Result      | Pos | Neg | Neg | Neg | Neg |       |

**B.**

|             |     |     |     |     |     |       |
|-------------|-----|-----|-----|-----|-----|-------|
|             |     |     |     |     |     |       |
|             | X   |     |     |     |     | 1 Pos |
|             |     |     |     |     |     | 2 Neg |
|             |     |     |     |     |     | 3 Neg |
|             |     |     |     |     |     | 4 Neg |
|             |     |     |     |     | X   | 5 Pos |
| Column pool | 1   | 2   | 3   | 4   | 5   |       |
| Result      | Pos | Neg | Neg | Neg | Pos |       |

**C.**

|             |     |     |     |     |     |       |
|-------------|-----|-----|-----|-----|-----|-------|
|             |     |     |     |     |     |       |
|             | X   |     |     |     |     | 1 Pos |
|             |     |     |     |     |     | 2 Neg |
|             |     |     |     |     |     | 3 Neg |
|             |     |     |     |     |     | 4 Neg |
|             | X   |     |     |     |     | 5 Pos |
| Column pool | 1   | 2   | 3   | 4   | 5   |       |
| Result      | Pos | Neg | Neg | Neg | Neg |       |
